# Supplementary material for: Modelling of water and energy exchanges over a sparse olive orchard in semi-arid areas
Source: Copernicus journal article supplement (doi:10.5194/hess-2020-104), 2020-03-24
Supplement: Supplementary file [file hess-2020-104-AC2-supplement.pdf]

## Authors Response to Reviewer 2 comments

This manuscript presents an extensive field and modeling study to test the model scheme that better describes the energy fluxes over a sparse olive grove (7% vegetation cover). I find some critical issues with the measurements and the analysis, which I think the authors need to carefully consider before this paper can be published.

1. My main concern is that the authors have attempted to test the two versions of the model on daily and weekly scales, by modifying some of the parameters. These attempts seem to be arbitrary (for example, they changed the soil texture parameters although they have measured this quantity and they know what it is). Instead, they could have looked at finer temporal resolution (hourly or sub-hourly) to unravel the processes and the dynamics that contribute to the total daily fluxes. They also showed an agreement of  $\pm 50 \text{ W m}^{-2}$  for the daily fluxes claiming these are satisfactory error magnitudes, while these magnitudes are considered satisfactory at hourly scale but not at daily scale.

### Response:

*We thank the reviewer for his in depth reading of the manuscript.*

*As a first attempt, we choose the weekly and daily scales to ensure that daily and seasonal water and energy balances are consistent. The purpose was to test future scenarios based on projected climate forcing until 2050 in order to study the evolution of this system functioning under predicted climate changes. We will now focus on diurnal fluctuations of the energy budget components as well as its impact on the root-tree-atmosphere transfers at hourly time scales in order to better document the stomatal functioning and the hydraulic redistribution. To do so, sap flow systems are going to be installed in roots. These finer scales could also be useful in the view of the remote sensing data assimilation, particularly surface temperature.*

*The soil texture parameters were modified from measured values as an attempt to explain whether one can decrease the RMSE between the simulated and observed evaporation rates of the bare soil patch due to inaccurate soil transfer parameters (ISBA pedotransfer functions used to derive the water retention and conductivity curves), while retaining the consistency between the parameter values with respect with soil textural properties (e.g. ensuring that one keeps a sandy behavior or a more silty behavior for all soil parameters, not each one separately). But this optimization fails to decrease the sharp peak of modeled soil evaporation to the observed one after rain event even with a fraction of sand of 100 %. So, we deduced that it was not a soil moisture availability issue but a potential transpiration rate issue due to the way transpiration is computed and scaled to the whole area. Finally, the observed parameters of the soil are kept for the rest of the study. This would be mentioned in the revision manuscript.*

*For the RMSE, it should be remembered that, over this specific cover of very sparse olive orchard in semi-arid area, it would be difficult to find better results. Indeed, the fluxes shown in the Figure 8 corresponds to mean values between 9h and 16h and this would be clearly stated in the text and in the figure captions. They were considered as satisfactory because their RMSE, for example for the latent heat flux ( $15.07 \text{ W/m}^2$  for 1P and  $24.75 \text{ W/m}^2$  for 2P) fall within the range between the hourly ( $50 \text{ W/m}^2$ ) and the daily ( $20 \text{ W/m}^2$ ) accepted thresholds including night data as cited by Kalma et al. (2008). In fact, hourly RMSE for LE was about  $47.54 \text{ W/m}^2$  and  $55.27 \text{ W/m}^2$  for the 1P and the 2P configurations, respectively. Daily RMSE for LE was about  $11.08 \text{ W/m}^2$  and  $14.31 \text{ W/m}^2$  for the 1P and the 2P configurations, respectively. Such details would be made more explicit in the revised manuscript*

2. L67 and L130: « ... ) »

Response:

“...)” would be replaced by “, etc)”.

3. L72: (H. J. Farahani and W. C. Bausch, 1995)

Response:

The reference format would be corrected.

4. L104: S–W not defined

Response:

It would be defined as follow in the revision “the Shuttleworth-Wallace model (S–W model)”

5. L105: LE not defined

Response:

It would be defined as follow in the revision “latent heat flux (LE)”

5. L148: through? the word "while" is misused here.

Response:

As suggested, while would be replaced with “through” in the revised manuscript

6. L140: “1/ the very low fraction cover in the study site equal to 7 %, which can be regarded as bare soil, results in low fraction of net radiation available to the vegetation if the partitioning is based on this horizontal projection fraction. It seems also that “big leaf” potential evapotranspiration derived from most SVAT models, which use the vegetation fraction cover as weighting factor for the turbulent fluxes partition, do not allow to achieve a sufficient order of magnitude compared to the observed one. For instance, to simulate a transpiration value equivalent to the maximum of 3 mm day per day recorded during the wet period over the same study site (Chebbi et al., 2018), a potential amount of  $(3/(fc=0.07))=42$  mm per day would be required. The observed transpiration was checked in Chebbi et al. (2018) through comparison to the difference between the observed evapotranspiration and evaporation. Moreover, the order of magnitude of our observed transpiration rate falls within the range documented in the literature (Moreno et al., 1996; Tognetti et al., 2006). Indeed, Santos et al. (2018) reported mean transpiration of 1.5 mm per day with maximum values observed in the summer under deficit irrigation treatment over 10 years old olive trees with a spacing of (4.2×8 m) in southern Alentejo, Portugal. Similarly, Moriondo et al. (2019) validated their model (dedicated to the simulation of growth and development of olive trees) against a set of data collected over a rainfed olive grove in Italy with ground cover of 0.19. In their research, it was also found that the simulated as well as the observed transpirations reach 3 mm per day on July. Therefore, there is a clear deficiency in the modeled potential transpiration rate to represent the contribution of transpiration to the whole area in the case of fraction cover partitioning. The area average transpiration is clearly stemming from a larger contributing surface than what can be classically computed from a turbid medium with clump LAI of woody trees (roughly 3) weighted by the fraction cover, and must be calculated by aggregating a larger leaf-atmosphere interacting layer.” This belong in the discussion rather than in the introduction. There seems to be a lack of information here. What do the models calculate? How far are they?

Response:

Our choice to keep this paragraph in the introduction can be justified by the main concerns

*that we expect to encounter in such environment with very low fraction cover and for which we try to provide an answer. Here, we explain how all SVAT models that use the vegetation fraction cover to partition evaporation and transpiration, could not in all cases reach the observed transpiration of 3 mm per day. In the paper, we want to first document and explain this mismatch by changing the input parameters in a new PFT while keeping the model structure as it is. It thus belongs to Introduction. In the Result section, the answer to the question “how far are they” is further documented. Here, we only stress as a justification of the research that no model based on fc can have a transpiration rate of 42 mm/day which would lead to the observed 3 mm per day if partitioning is on the basis of 7% cover.*

7. L198: “The model was applied using parameters determined from observations or from the literature. First, the different ISBA outputs were compared with observed data, including an analysis of an inconsistency when dealing with the observed vegetation fraction cover of 7 % as the weighting of the evaporation E and transpiration T components. Then, the model was slightly revised to address some inconsistencies, principally the evapotranspiration partition. In particular, we look at how the effective area that transpires can be increased to match the observed T. Finally, the second issue deals with the choice between the patch (or uncoupled) approach and the layer (or coupled) approach and which is the configuration that better reproduce the water and energy exchanges, with respect to the vegetation sparseness and structure of this discontinuous canopy.” This is a mix of objectives and M&M. It is confusing and difficult to follow.

Response:

*As suggested by the reviewer 1, this paragraph would be removed in the revised manuscript.*

8. L210: “(Chebbi et al., 2018) provided a detailed description of the site. Details about the instrumentation and the database are available online (Chebbi, 2017).” This is not enough. I would want to know more about the site without having to go and read elsewhere. Please provide all the information you think is relevant here.

Response:

*In the revised version of the manuscript, the following paragraph would be added accordingly: “The experimental field is a rainfed olive grove in Kairouan, central Tunisia (35°18'17.14"; 9°54'56.62"). It is a semi-arid area characterized by the high spatio-temporal variability of precipitation and air temperature. The trees are 80 years old, spaced on a regular grid of 20 m by 20 m (about 25 trees ha<sup>-1</sup> and a fraction vegetation cover of 7 %) and the mean canopy height is maintained at about 5 m. The soil is loamy sand, with an average content of clay, silt and sand of 8 %, 4 % and 88 %, respectively and a bulk density of 1.65 g cm<sup>-3</sup>.”*

9. L216: « The setup consisted of instrumented towers with adjacent pits » Instrumented with what instrumentation?

Response:

*This paragraph would be modified as follow: “The setup consisted of two towers with adjacent pits, a tall one close to the tree instrumented with eddy covariance sensors and a shorter one over the bare soil at the center of a square delimited by four trees (including the one that is instrumented), both with net radiation sensors and soil heat flux plates at the surface. Therefore, one tower/pit couple is dedicated to the tree functioning and another is related to the bare soil at the inter-row.”.*

10. L220: “air temperature and relative humidity were sampled above the tree at 9.5 m height and above bare soil at 2.4 m height.” At 2.5 m I presume that the conditions measured were strongly influenced by the surrounding trees and did not represent the bare soil entirely.

Response:

*The model input data are derived from climate forcing sampled at 9.5 m. This would clearly state in the revision.*

11. L226: « the vegetation net radiation was estimated using NR01 net radiometer (Husekflux, Delft, the Netherlands) installed above the olive tree » At what height? This means you were assuming that Rn is evenly distributed across the soil and that measurement at one position is representative. I presume this is far from the reality and I wonder if you at least evaluated what might be the error introduced by this assumption.

Response:

*This sentence would be modified in the revised manuscript as follow: “the vegetation net radiation was estimated using NR01 net radiometer (Husekflux, Delft, the Netherlands) installed at 1.5 m above the olive tree, therefore seeing a mixed surface including canopy (80% of the Field Of View( FOV)) and bare soil (20% of the FOV)”.*

12. L228: « At the orchard scale, the whole net radiation was obtained by a weighted average of vegetation and bare soil data by their fraction covers. Similarly, the soil heat flux below the tree (i.e., in the shade for the most part of the morning till late in the afternoon) and the soil heat within the unshaded bare soil were determined separately using heat flux plates (Hukseflux HFP01, Delft, the Netherlands) inserted at a depth of 2 cm» One sample for each location? Given the heterogeneity nature of soils this is problematic. Its problematic for completely bare soils, and more so when there is sparse vegetation and the shading patterns change constantly. 1. It is reported and widely accepted in the literature that inserting a soil heat flux so close to the surface is problematic. 2. How did you account for the heat stored at the uppermost 2 cm above the plate? The amount of stored energy at this layer, especially under bare soil conditions may account for 10s of percent of the total flux, and ignoring it results in a large underestimation.

Responses:

*Heat flux plates (Hukseflux HFP01, Delft, the Netherlands) are placed at a depth of 2 cm: 2 plates below the tree and 4 plates below bare soil. For the bare soil and the soil under the tree, 3 plates are also inserted at depths roughly equal to 5, 15 and 30 cm. Bare soil is regularly ploughed and therefore fairly homogeneous at the surface.*

*The surface soil heat flux is calculated by correcting the soil heat flux at the 2 cm depth for the 0–2 cm heat storage as:*

$$G = G_z + [C \Delta T / \Delta t] * \Delta z$$

*where C is the heat capacity per unit volume of the soil, and  $\Delta T / \Delta t$  is the change of the mean temperature of the layer per unit time.*

*By doing so for the 4 heat plates at the bare soil site and the 2 plates below the canopy, one computes the soil heat flux in unshaded (Gs) and (Gv) conditions, respectively.*

*In the revised version of the manuscript, the following paragraph would be modified accordingly: “Similarly, the soil heat flux below the tree (i.e., 2 plates below the tree in the shade for the most part of the morning till late in the afternoon) and the soil heat within the unshaded bare soil (4 plates below bare soil) were determined separately using heat flux plates (Hukseflux HFP01, Delft, the Netherlands) inserted at a depth of 2 cm after correcting for the 0-2cm heat storage. Bare soil is regularly ploughed and therefore fairly homogeneous at the surface.”*

13. L232: «The turbulent heat fluxes were derived from the eddy covariance method». Did you apply all the relevant corrections to the flux computation? How did you obtain the fluxes? What software did you use? What sampling frequency did you use?

Response:

*Data from the EC system (20 Hz sampled measurements of wind speed and gas concentration) were collected. Quality control is analyzed using the “Eddypro” software (open source software application developed, maintain and supported by LI-COR Biosciences). We use the software's default settings for time-series checks, low and high pass filtering, density fluctuations, sonic anemometer tilt correction with double rotation.*

*The REddyProc tool (“Biogeochemical Integration | Services / REddyProcWebGapFilling,” 2011) is used to fill gaps of meteorological and processed eddy covariance data. This method consists in filling water fluxes gaps required to estimate monthly balances using data with similar meteorological conditions defined via the global radiation ( $R_g$ ), the air temperature ( $T_a$ ) and the vapor pressure deficit (VPD).*

*Some of these details would be added in the revised manuscript.*

14. L273: “Reverse the order of the figure so that the text follows it - fig. 1a should be described first and then fig. 1b.”.

Response:

*The two panels would be inverted.*

15. L295: «The vertical soil texture was prescribed for all layers according to observations»  
Number of repetitions?

Response:

*Three repetitions per layer.*

16. L315: «The modelling of the water and energy fluxes over heterogeneous covers, like our olive groves, faces many significant issues related to both the low LAI and the complex 3D structure of the trees (Unland et al., 1996). One of the main purposes of the study is to simulate the energy budget components over such sparse cover » This better suit in the introduction

Response:

*Would be moved as suggested to the introduction.*

17. L318: «The closure of the observed energy budget was already checked and the errors in the measurements were discussed in our previous study (Chebbi et al., 2018) » and the findings were that? Is it a good closure? a bad one? Again I need to go look for yet another paper to read. Please provide the main findings here if they are relevant.

Response:

*The closure of the energy balance for the whole three-year study is first assessed using half hourly values of the energy balance components for each day. The slope is about 0.91, the intercept is about  $12.06 \text{ W m}^{-2}$  and the coefficient of determination is 0.75. As shown by Anderson and Wang (2014) and Leuning et al. (2012), the energy balance closure is improved when aggregated to daily totals. The slope is then about 0.98 the intercept is  $16.6 \text{ W m}^{-2}$  and the coefficient of determination is 0.83.*

*Such details would be made more explicit in the revised manuscript.*

18. L322: «The model was not able to track the seasonal dynamics particularly for the latent heat flux which decrease sharply after each rain event (not shown). In addition, the RMSE between the observed total fluxes over the orchard and the simulated fluxes from the sole bare soil patch



were significant about 31.46, 73.24, 58.23 and 44.12 W m<sup>-2</sup> for Rn, G, LE and H, respectively. This highlights the interest in representing appropriately the tree which has a major impact on the fluxes » I suggest excluding this paragraph. It is obvious and does not contribute to the story.

Response:

*This paragraph would be removed as suggested.*

19. L333: «For all the energy budget terms, the RMSE between observations and simulations do not exceed the range of the measurement error and the current acceptable threshold of 50 W m<sup>-2</sup> (Wilson et al., 2002), with lower values for the heat soil flux and the latent heat flux (21.21 W m<sup>-2</sup> and 24.06 W m<sup>-2</sup> respectively). » This acceptable threshold is for hourly data not for daily averages. For daily averages these errors are rather large. They are lower as the fluxes are smaller. In percentage the LE errors are ~50%! They are very large. This is also shown in the very low r<sup>2</sup>=0.32. Did you verify that this correlation is significant?

Response:

*See answer to 1. Those are mean values between 9h and 16h and these fluxes correspond the run before applying the proposed adjustment for LE. This statement could be rephrased in the revised manuscript since this threshold correspond to the Latent heat flux at hourly scale.*

20. L466: «In conclusion, it appears that splitting the cover into two different soil water budgets is not representative of the water transfer occurring in reality» This is expected and somewhat trivial. In order to really get down to understanding the governing factors (and not just modify somewhat arbitrarily the model parameters, like changing the soil structure (wasn't this measured in the field? what sense does it make to change this in the model?) one probably needs to look at finer temporal resolutions. The effects and the dynamics are at half-hourly or hourly scales and not daily (or weekly).

Response:

*We agree with the reviewer that splitting the soil into two compartments is expected. However, here, we try to quantify the error propagation due to this cover dispatching and to show how far is it from reality since the 2P configuration is used for sparse orchard functioning description by the scientific community. In fact, the use of the patch configuration requires the introduction of a term source/sink at the root system level ensuring the compulsory exchange between the two columns.*

*See response to 1 for looking to intraday scale.*

21. L471: «the 1P configuration provides better results than that of the 2P one » I see inconsistency with RMSE increase for 2 of the fluxes and decrease for the other 2, so how can you state this? L483: « In fact, it appears that splitting the cover into two patches with no interaction at the aerodynamic level (i.e., uncoupled convective fluxes scheme) does not reflect the real turbulent transfers. » How can you justify this conclusion when only 2 of the fluxes performed better?

Response:

*We already justify that for the latent heat flux the coupling between the two columns is necessary for a good estimate of the total evapotranspiration and its components. However, for the net radiation, better scores were obtained from the patch configuration.*

*The scores of the soil heat flux were unexpected. In fact, G derived from the 2P configuration, with a larger fraction of sunlight bare soil than the one in the 1P run, would normally represents better the observations. Now, we could not provide additional explanations.*

*These conclusions would be modified in the revision as follow:*

*“the 1P configuration provides better results than that of the 2P one for LE”*

*“In fact, it appears that splitting the cover into two patches with no interaction does not reflect the real turbulent transfers at least for the latent heat flux. However, the 2P configuration seems to be more realistic for the net radiation. This suggests that a so-called “mixed” model (standard 1P for H and LE and soil, but patch formulation for Rn) would probably better represent the functioning of this sparse orchard.”*

## References

- Anderson, R.G., Wang, D., 2014. Energy budget closure observed in paired Eddy Covariance towers with increased and continuous daily turbulence. *Agric. For. Meteorol.* 184, 204–209. <https://doi.org/10.1016/J.AGRFORMET.2013.09.012>
- Biogeochemical Integration | Services / REddyProcWebGapFilling [WWW Document], 2011. URL <https://www.bgc-jena.mpg.de/bgi/index.php/Services/REddyProcWebGapFilling> (accessed 1.7.17).
- Chebby, W., 2017. nasrallah flux database [WWW Document]. SEDOO OMP website. [https://doi.org/DOI: 10.6096/MISTRALS-SICMED.1479](https://doi.org/DOI:10.6096/MISTRALS-SICMED.1479)
- Chebby, W., Boulet, G., Le Dantec, V., Lili Chabaane, Z., Fanise, P., Mougnot, B., Ayari, H., 2018. Analysis of evapotranspiration components of a rainfed olive orchard during three contrasting years in a semi-arid climate. *Agric. For. Meteorol.* 256–257, 159–178. <https://doi.org/10.1016/J.AGRFORMET.2018.02.020>
- Kalma, J.D., McVicar, T.R., McCabe, M.F., 2008. Estimating Land Surface Evaporation: A Review of Methods Using Remotely Sensed Surface Temperature Data. *Surv. Geophys.* 29, 421–469. <https://doi.org/10.1007/s10712-008-9037-z>
- Leuning, R., Gorsel, E. van, Massman, W.J., Issac, P.R., 2012. Reflections on the surface energy imbalance problem. *Agric. For. Meteorol.* 156, 65–74. <https://doi.org/10.1016/J.AGRFORMET.2011.12.002>
- Moreno, F., Fernandez, J.E., Clothier, B.E., Green, S.R., 1996. Transpiration and root water uptake by olive trees. *Plant Soil* 184, 85–96. <https://doi.org/10.1007/BF00029277>
- Moriondo, M., Leolini, L., Brillì, L., Dibari, C., Tognetti, R., Giovannelli, A., Rapi, B., Battista, P., Caruso, G., Gucci, R., Argenti, G., Raschi, A., Centritto, M., Cantini, C., Bindi, M., 2019. A simple model simulating development and growth of an olive grove. *Eur. J. Agron.* 105, 129–145. <https://doi.org/10.1016/j.eja.2019.02.002>
- Santos, F., Santos, L., F., 2018. Olive Water Use, Crop Coefficient, Yield, and Water Productivity under Two Deficit Irrigation Strategies. *Agronomy* 8, 89. <https://doi.org/10.3390/agronomy8060089>
- Tognetti, R., d'Andria, R., Lavini, A., Morelli, G., 2006. The effect of deficit irrigation on crop yield and vegetative development of *Olea europaea* L. (cv. Frantoio and Leccino). *Eur. J. Agron.* 25, 356–364. <https://doi.org/10.1016/j.eja.2006.07.003>
- Wilson, K., Goldstein, A., Falge, E., Aubinet, M., Baldocchi, D., Berbigier, P., Bernhofer, C., Ceulemans, R., Dolman, H., Field, C., Grelle, A., Ibrom, A., Law, B., Kowalski, A., Meyers, T., Moncrieff, J., Monson, R., Oechel, W., Tenhunen, J., Valentini, R., Verma, S., 2002. Energy balance closure at FLUXNET sites. *Agric. For. Meteorol.* 113, 223–243. [https://doi.org/10.1016/S0168-1923\(02\)00109-0](https://doi.org/10.1016/S0168-1923(02)00109-0)
